# Supplementary material for: Neonatal Platelets: Lower G12/13 Expression Contributes to Reduced Secretion of Dense Granules
Source: MDPI journal article supplement (doi:10.3390/cells11162563), 2022-08-17
Supplement: s1 [file s1]

## Supplementary material

**Table S1.** CD63 expression in adult and neonatal platelets after stimulation with increasing amounts of thrombin. Results are presented as mean±sd. Data (n= 11 per cohort) are normalized to maximal response measured in adult control samples run in parallel.

| Thrombin concentrations [U/ml] | Adult [%] | Neonatal [%] | P      |
|--------------------------------|-----------|--------------|--------|
| 0                              | 8.74±3.01 | 8.26±2.41    | >0.999 |
| 0.05                           | 47.9±14.5 | 14.6±4.3     | <0.001 |
| 0.1                            | 67.5±9.0  | 25.9±6.3     | <0.001 |
| 0.2                            | 85.6±7.2  | 54.7±8.1     | <0.001 |
| 0.5                            | 96.9±6.71 | 79.4±12.1    | 0.0102 |
| 1                              | 100*      | 84.7±11.6    | 0.0340 |

\*normalized percentage
